# Supplementary material for: Determinants of community structure of zooplankton in heavily polluted river ecosystems
Source: PubMed Central journal article supplement (PMC4766567; doi:10.1038/srep22043), 2016-02-25
Supplement: srep22043-s1.pdf [file srep22043-s1.pdf]

## **Determinants of community structure of zooplankton in heavily polluted river ecosystems**

Wei Xiong<sup>1#</sup>, Jie Li<sup>2#</sup>, Yiyong Chen<sup>1</sup>, Baoqing Shan<sup>1</sup>, Weimin Wang<sup>2</sup>, Aibin Zhan<sup>1\*</sup>

<sup>1</sup>Research Center for Eco-Environmental Sciences, Chinese Academy of Sciences, 18

Shuangqing Road, Haidian District, Beijing 100085, China

<sup>2</sup>College of Fisheries, Huazhong Agricultural University, 1 Shizishan Street, Wuhan 430070,

China

\*.Corresponding author: Prof. Aibin Zhan; Email: [azhan@rcees.ac.cn](mailto:azhan@rcees.ac.cn) or

[zhanaibin@hotmail.com](mailto:zhanaibin@hotmail.com); Phone: (+86)-10-6284-9882; Fax: (+86)-10-6284-9882

# These two authors contribute equally to this work

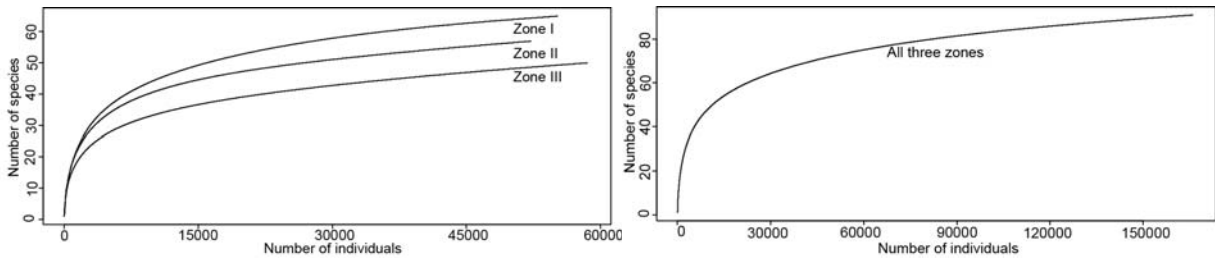

**Supplementary Figure S1** Rarefaction curves of counted individuals of rotifers. Left - the each zone, right - the combined set 94 samples.

**Supplementary Table S1** Summary of principal component analyses on 13 biotic and abiotic factors in all 94 sampling sites. Factors in red were examined to be representing primary gradients of corresponding component. Distance = average geographical distance of a given sampling site from the other sampling sites, T = water temperature, SD = Secchi disk depth, TP = total phosphorus, SRP = soluble reactive phosphorus, TN = total nitrogen, NO<sub>3</sub>-N = nitrate nitrogen, NH<sub>4</sub>-N = ammonia nitrogen, Protozoa = the total abundance of all protozoa species, Crustacea = the total abundance of all crustacean species.

|                    | Component    |               |               |              |              |
|--------------------|--------------|---------------|---------------|--------------|--------------|
|                    | 1            | 2             | 3             | 4            | 5            |
| Longitude          | -0.056       | <b>0.933</b>  | -0.109        | -0.068       | 0.061        |
| Latitude           | 0.107        | <b>0.862</b>  | 0.296         | 0.21         | 0.047        |
| Altitude           | -0.233       | <b>-0.678</b> | 0.516         | 0.059        | -0.097       |
| Distance           | -0.388       | <b>-0.575</b> | -0.016        | 0.465        | 0.222        |
| T                  | -0.02        | -0.16         | <b>-0.832</b> | -0.183       | -0.11        |
| SD                 | -0.142       | -0.15         | <b>0.681</b>  | -0.166       | -0.101       |
| TP                 | <b>0.918</b> | 0.135         | -0.05         | 0.14         | -0.066       |
| SRP                | <b>0.912</b> | 0.126         | -0.059        | 0.153        | -0.089       |
| TN                 | <b>0.904</b> | 0.072         | 0.009         | 0.159        | 0.105        |
| NO <sub>3</sub> -N | <b>0.805</b> | -0.126        | -0.11         | -0.227       | 0.106        |
| NH <sub>4</sub> -N | 0.249        | 0.02          | 0.025         | <b>0.839</b> | -0.055       |
| Protozoa           | -0.007       | 0.072         | -0.031        | -0.01        | <b>0.921</b> |
| Crustacea          | -0.196       | <b>0.405</b>  | -0.301        | 0.298        | -0.333       |

**Supplementary Table S3** The average similarity of rotifer communities among sampling sites

within each zone based on the similarity percentage (SIMPER) analysis in the plain region of the

Haihe River Basin.

| <b>Zone I: Average similarity: 13.44</b>   |                   |                    |            |                  |                |
|--------------------------------------------|-------------------|--------------------|------------|------------------|----------------|
| Species                                    | Average abundance | Average similarity | Similarity | Contribution (%) | Cumulation (%) |
| <i>Polyarthra trigla</i>                   | 463.39            | 2.56               | 0.45       | 19.02            | 19.02          |
| <i>Brachionus angularis</i>                | 92.68             | 1.79               | 0.42       | 13.31            | 32.34          |
| <i>Brachionus urceus</i>                   | 330               | 1.76               | 0.48       | 13.11            | 45.44          |
| <i>Filinia maio</i>                        | 157.5             | 1.75               | 0.37       | 13.04            | 58.48          |
| <i>Pompholyx sulcata</i>                   | 26.25             | 0.95               | 0.32       | 7.05             | 65.53          |
| <i>Brachionus calyciflorus</i>             | 20.36             | 0.78               | 0.32       | 5.77             | 71.3           |
| <i>Trichocerca</i> sp.                     | 202.5             | 0.65               | 0.32       | 4.81             | 76.11          |
| <i>Brachionus calyciflorus</i>             | 83.57             | 0.53               | 0.33       | 3.97             | 80.08          |
| <i>Philodina</i> sp.                       | 12.86             | 0.52               | 0.24       | 3.83             | 83.91          |
| <i>Brachionus budapesllensis</i>           | 26.25             | 0.38               | 0.24       | 2.85             | 86.76          |
| <i>Euchlanis</i> sp.                       | 9.11              | 0.3                | 0.18       | 2.21             | 88.98          |
| <i>Philodina megalotrocha</i>              | 35.36             | 0.3                | 0.12       | 2.21             | 91.18          |
| <b>Zone II: Average similarity: 19.22</b>  |                   |                    |            |                  |                |
| <i>Brachionus angularis</i>                | 192.32            | 4.58               | 0.78       | 23.81            | 23.81          |
| <i>Polyarthra trigla</i>                   | 445.18            | 3.63               | 0.58       | 18.87            | 42.67          |
| <i>Filinia maio</i>                        | 71.79             | 2.62               | 0.49       | 13.65            | 56.33          |
| <i>Brachionus calyciflorus</i>             | 260.89            | 2.49               | 0.55       | 12.93            | 69.26          |
| <i>Brachionus urceus</i>                   | 73.93             | 1.93               | 0.4        | 10.02            | 79.28          |
| <i>Keratella valga</i>                     | 26.25             | 0.71               | 0.37       | 3.68             | 82.96          |
| <i>Filinia longisela</i>                   | 221.79            | 0.66               | 0.2        | 3.45             | 86.42          |
| <i>Trichocerca pusilla</i>                 | 56.79             | 0.64               | 0.28       | 3.31             | 89.73          |
| <i>Trichocerca</i> sp.                     | 71.25             | 0.56               | 0.26       | 2.9              | 92.63          |
| <b>Zone III: Average similarity: 24.49</b> |                   |                    |            |                  |                |
| <i>Brachionus urceus</i>                   | 131.05            | 5.83               | 0.81       | 23.8             | 23.8           |
| <i>Brachionus angularis</i>                | 195.79            | 4.93               | 0.79       | 20.13            | 43.93          |
| <i>Polyarthra trigla</i>                   | 428.29            | 3.92               | 0.65       | 16.02            | 59.95          |
| <i>Trichocerca</i> sp.                     | 137.76            | 2.86               | 0.52       | 11.67            | 71.62          |
| <i>Brachionus calyciflorus</i>             | 123.55            | 2.32               | 0.54       | 9.47             | 81.09          |
| <i>Filinia maio</i>                        | 112.5             | 1.29               | 0.35       | 5.28             | 86.37          |
| <i>Brachionus budapesllensis</i>           | 24.87             | 0.65               | 0.29       | 2.67             | 89.03          |
| <i>Keratella valga</i>                     | 41.05             | 0.58               | 0.3        | 2.38             | 91.41          |
